# Supplementary material for: Real-World Impact of Upfront Cytoreductive Nephrectomy in Metastatic Non-Clear Cell Renal Cell Carcinoma Treated with First-Line Immunotherapy Combinations or Tyrosine Kinase Inhibitors (A Sub-Analysis from the ARON-1 Retrospective Study)
Source: Springer Nature journal article supplement (doi:10.1007/s11523-024-01065-w), 2024-05-05

## Supplementary Material

### **Real-world impact of upfront cytoreductive nephrectomy in metastatic non-clear cell renal cell carcinoma treated with first-line immunotherapy combinations or tyrosine kinase inhibitors (a sub-analysis from the ARON-1 retrospective study)**

Ondřej Fiala<sup>1,2\*</sup>, Sebastiano Buti<sup>3,4\*</sup>, Aristotelis Bamias<sup>5</sup>, Francesco Massari<sup>6,7</sup>, Renate Pichler<sup>8</sup>, Marco Maruzzo<sup>9</sup>, Enrique Grande<sup>10</sup>, Ugo De Giorgi<sup>11</sup>, Javier Molina-Cerrillo<sup>12</sup>, Emmanuel Seront<sup>13</sup>, Fabio Calabrò<sup>14</sup>, Zin W Myint<sup>15</sup>, Gaetano Facchini<sup>16</sup>, Ray Manneh Kopp<sup>17</sup>, Rossana Berardi<sup>18</sup>, Jakub Kucharz<sup>19</sup>, Maria Giuseppa Vitale<sup>20</sup>, Alvaro Pinto<sup>21</sup>, Luigi Formisano<sup>22</sup>, Thomas Büttner<sup>23</sup>, Carlo Messina<sup>24</sup>, Fernando Sabino M. Monteiro<sup>25</sup>, Nicola Battelli<sup>26</sup>, Ravindran Kanesvaran<sup>27</sup>, Tomáš Büchler<sup>28</sup>, Jindřich Kopecký<sup>29</sup>, Daniele Santini<sup>30</sup>, Giulia Claire Giudice<sup>3,4</sup>, Camillo Porta<sup>31§</sup>, Matteo Santoni<sup>26§</sup>

\*co-first author; §co-senior authors

<sup>1</sup>Department of Oncology and Radiotherapeutics, Faculty of Medicine and University Hospital in Pilsen, Charles University, alej Svobody 80, Pilsen 304 60, Czech Republic; <sup>2</sup>Biomedical Center, Faculty of Medicine in Pilsen, Charles University, alej Svobody 76, Pilsen, Czech Czech Republic; <sup>3</sup>Department of Medicine and Surgery, University of Parma, Via Gramsci 14, 43126, Parma, Italy; <sup>4</sup> Oncology Unit, University Hospital of Parma, Via Gramsci 14, 43126, Parma, Italy; <sup>5</sup>2nd Propaedeutic Department of Internal Medicine, School of Medicine, ATTIKON University Hospital, National and Kapodistrian University of Athens, Athens, Greece; <sup>6</sup>Medical Oncology, IRCCS Azienda Ospedaliero-Universitaria di Bologna, Bologna, Italy; <sup>7</sup>Department of Medical and Surgical Sciences (DIMEC), University of Bologna, Bologna, Italy; <sup>8</sup>Department of Urology, Medical University of Innsbruck, Anichstrasse 35, 6020 Innsbruck, Austria; <sup>9</sup>Oncology 1 Unit, Department of Oncology, Istituto Oncologico Veneto IOV -

IRCCS, Padova, Italy; <sup>10</sup>Department of Medical Oncology, MD Anderson Cancer Center Madrid, Universidad Francisco de Vitoria, Madrid, Spain; <sup>11</sup>Department of Medical Oncology, IRCCS Istituto Romagnolo per lo Studio dei Tumori (IRST) "Dino Amadori", Meldola, Italy; <sup>12</sup>Department of Medical Oncology, Hospital Ramón y Cajal, Madrid, Spain; <sup>13</sup>~~Department of Medical Oncology, Centre Hospitalier de Jolimont, Haine Saint Paul, Belgium;~~ <sup>14</sup>Medical Oncology 1-IRCCS Regina Elena National Cancer Institute, Rome, Italy; <sup>15</sup>Markey Cancer Center, University of Kentucky, Lexington, KY, 40536-0293, USA; <sup>16</sup>Oncology Operative Unit, "Santa Maria delle Grazie" Hospital, Pozzuoli, Napoli, ASL NA2 NORD 80078, Italy; <sup>17</sup>Clinical Oncology, Sociedad de oncología y hematología del Cesar, Valledupar, Colombia; <sup>18</sup>Department of Medical Oncology, Università Politecnica delle Marche, AOU delle Marche, Ancona, Italy; <sup>19</sup>Department of Uro-oncology, Maria Sklodowska-Curie National Research Institute of Oncology Warsaw, Poland; <sup>20</sup>Division of Oncology, Department of Oncology and Hematology, University Hospital of Modena, 41124 Modena, Italy; <sup>21</sup>Medical Oncology Department, La Paz University Hospital, Madrid, Spain; <sup>22</sup>Department of Medicine and Surgery, Federico II University, Naples, Italy; <sup>23</sup>Department of Urology, University Hospital Bonn (UKB), 53127 Bonn, Germany; <sup>24</sup>Oncology Unit, A.R.N.A.S. Civico, Palermo, Italy; <sup>25</sup>Latin American Cooperative Oncology Group – LACOG and Oncology and Hematology Department, Hospital Sirio-Libanês, SGAS 613 Lote 94, Brasília-DF, Brazil; <sup>26</sup>Oncology Unit, Macerata Hospital, Via Santa Lucia 2, Macerata, 62100, Italy; <sup>27</sup>National Cancer Centre Singapore, Singapore; <sup>28</sup>Department of Oncology, Second Faculty of Medicine, Charles University and Motol University Hospital, V Uvalu 84, 150 06, Prague, Czech Republic; <sup>29</sup>Department of Clinical Oncology and Radiotherapy, University Hospital Hradec Kralove, Hradec Kralove, Czech Republic; <sup>30</sup>Department of Medical-Surgical Sciences and Biotechnologies, Sapienza University, Policlinico Umberto1, Rome Italy; <sup>31</sup>Interdisciplinary Department of Medicina, University of Bari "Aldo Moro" and Division of Medical Oncology, A.O.U. Consorziiale Policlinico di Bari, Bari, Italy.

### *Overall and progression-free survival in specific groups*

According to the IMDC risk, intermediate-risk patients showed longer OS compared to poor-risk patients (30.0 months, 95%CI 24.8–41.7 vs 13.3 months, 95%CI 9.2–23.9,  $p < 0.001$ , **Figure S2**), while the difference in PFS was not significant (10.0 months, 95%CI 6.6–80.0 vs 6.5 months, 95%CI 4.8–10.1,  $p = 0.217$ , **Figure S2**).

Stratified by the first-line therapy, the median OS was 26.9 months (95%CI 22.1–36.8) vs 24.9 months (95%CI 22.3–35.3) for patients receiving TKI monotherapy or IO combinations, respectively ( $p = 0.579$ ), with a 2y-OS rate of 55% for both subgroups. According to the IMDC risk, in the intermediate-risk patients the median OS was 28.8 months (95%CI 22.3–35.3) for IO combinations vs 30.0 months (95%CI 24.9–71.3) for TKI monotherapy ( $p = 0.962$ ) and in the poor-risk patients, the median OS was 12.7 months (95%CI 7.0–15.4) for IO combinations vs 16.7 months (95%CI 11.0–27.7) for those receiving TKI monotherapy ( $p = 0.593$ ). The median PFS was 13.0 months (95%CI 8.3–16.9) for patients treated with IO combinations vs 6.5 months (95%CI 5.3–80.0) for those receiving TKI monotherapy ( $p = 0.002$ , **Figure S3**). In the intermediate-risk patients, the median PFS was 15.9 months (95%CI 8.8–26.4) for IO combinations vs 6.5 months (95%CI 5.3–80.0) for TKI monotherapy ( $p = 0.003$ , **Figure S3**). In the poor-risk patients, the median PFS was 10.1 months (95%CI 3.2–15.2) for IO combinations vs 6.0 months (95%CI 3.9–7.4) for those receiving TKI monotherapy ( $p = 0.264$ ).

According to the IMDC risk groups, in the intermediate-risk and poor-risk patients, the median OS with IO+TKI was 31.1 months (95%CI 20.8–40.5) and 15.4 months (95%CI 7.0–15.4), while IO+IO combination showed median OS 28.8 months (95%CI 7.8–28.8,  $p = 0.628$ ) and 7.7 months (95%CI 2.6–11.9,  $p = 0.100$ ) in the two IMDC groups, respectively. In the intermediate-risk patients, the median PFS was 16.8 months (95%CI 12.8–18.6) for IO+TKI and 8.3 months (95%CI 4.1–47.6) for IO+IO ( $p = 0.213$ ). In the poor-risk patients, the median PFS was 12.7 months (95%CI 3.2–23.5) for IO+TKI vs 6.0 months (95%CI 2.0–15.0) for IO+IO ( $p = 0.382$ ).

**Figure S1.** Patients' selection process from the ARON-1 study.

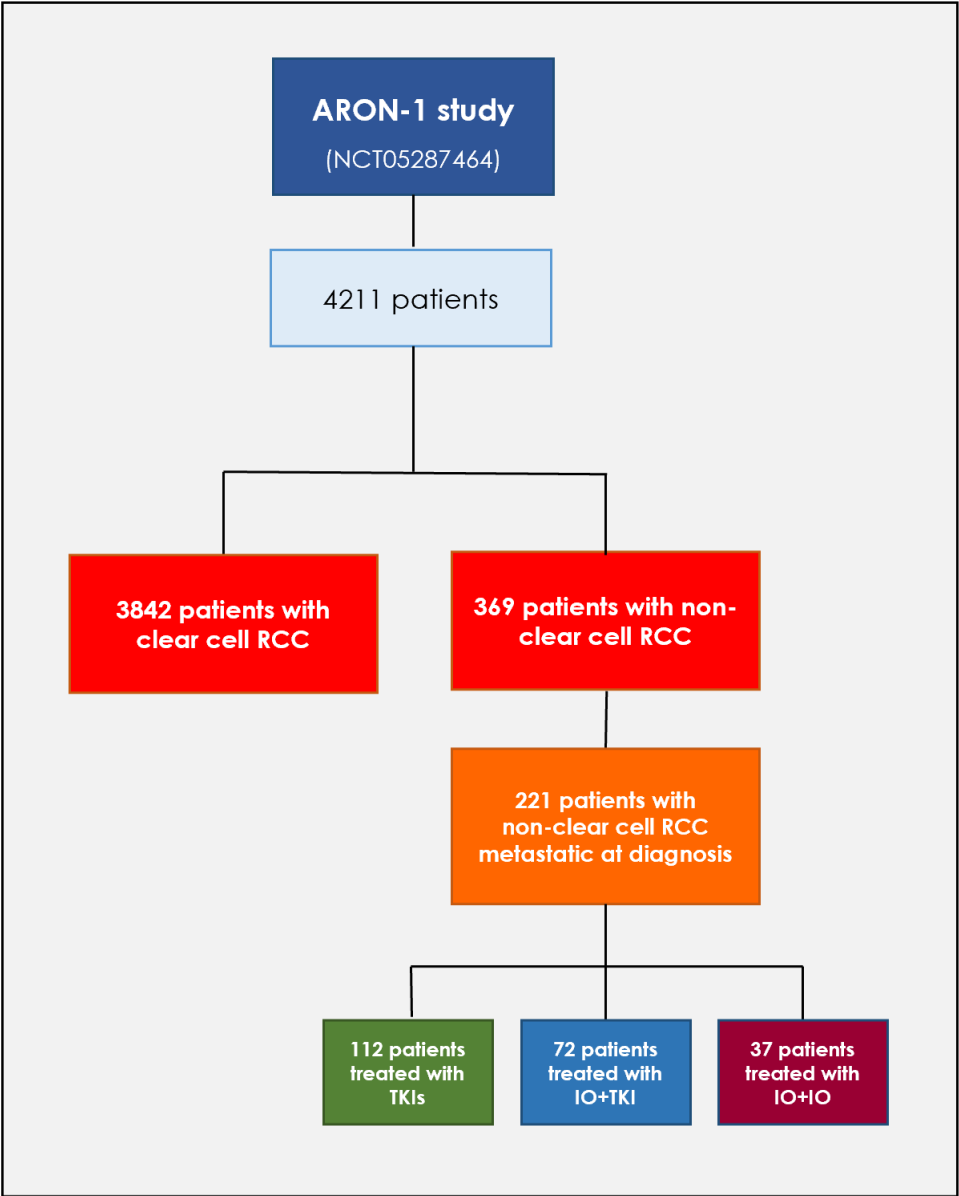

RCC = renal cell carcinoma; IO = immuno-oncology; TKI = tyrosine kinase inhibitor

**Figure S2.** Kaplan-Meier estimates of progression-free survival and overall survival according to IMDC risk.

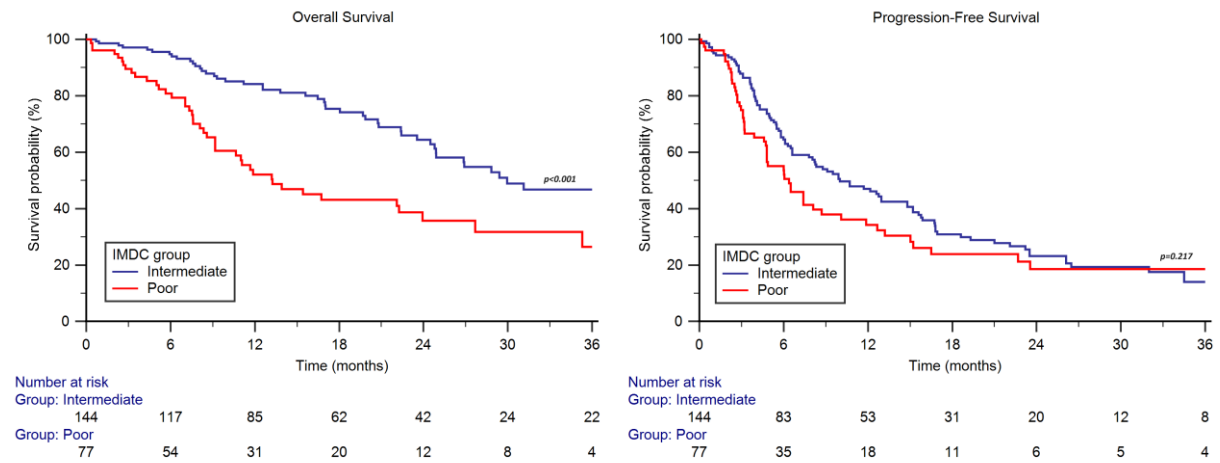

**Figure S3.** Kaplan-Meier estimates of progression-free survival according to the type of first-line therapy. Comparison between tyrosine kinase inhibitor (TKI) monotherapy and immuno-oncology (IO) combinations.

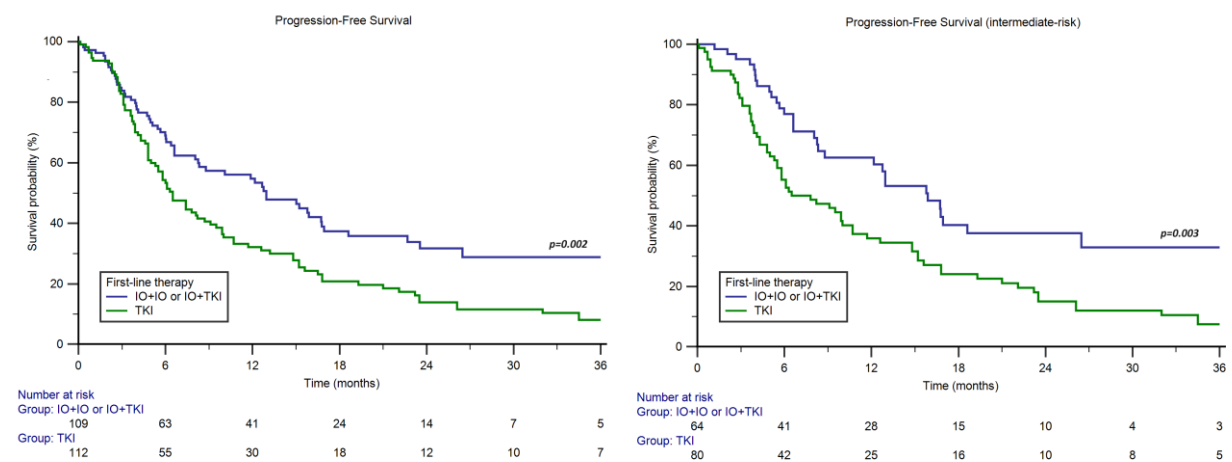

Supplement: MOESM1 [file 11523_2024_1065_MOESM1_ESM.pdf]
